# Supplementary material for: Laser-induced fabrication of single crystal zinc hydroxyl dodecylsulfate nano-sheets with excellent fluorescence emission
Source: Royal Society of Chemistry journal article supplement (doi:10.1039/c5ra11191a), 2015-01-01
Supplement: c5ra11191a1.pdf [file c5ra11191a1.pdf]

Supplementary Information

**Laser-induced fabrication of single crystal zinc hydroxyl  
dodecylsulfate nano-sheets with excellent fluorescence emission**

Shuang Li, DaMeng Wang, ZiYu Wang, ZiWei Wang, Ming Chen\* and XiangDong Liu

*School of Physics, Shandong University, Jinan250100, China*

[\\*chenming@sdu.edu.cn](mailto:chenming@sdu.edu.cn)

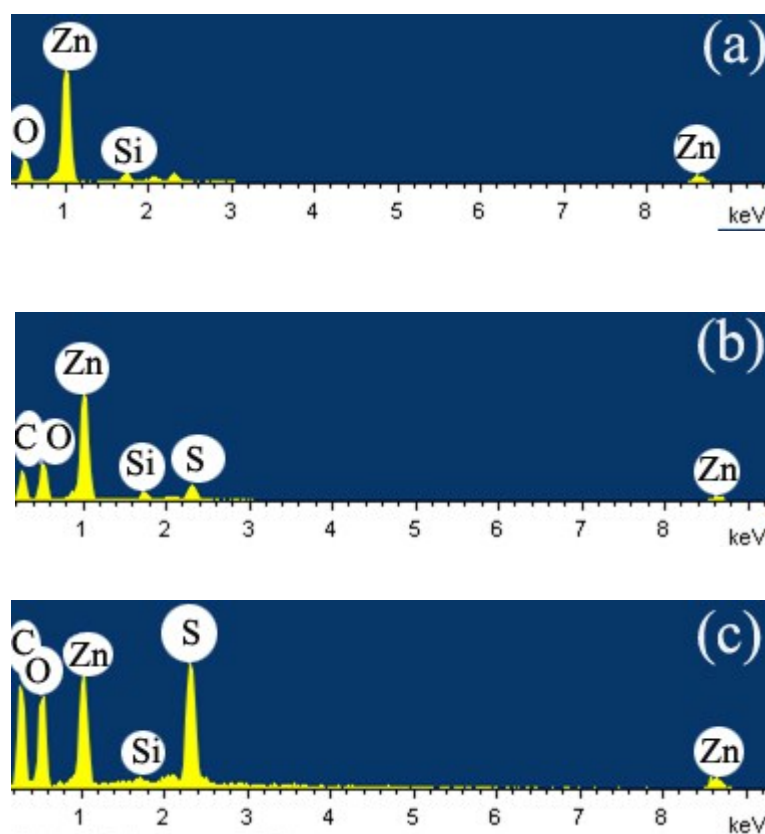

Figure.S1 EDS patterns of the typical productions with SDS concentrations of (a) 0.5mM, (b) 25mM, (c) 50 mM, respectively.
